# Supplementary material
Source: Research Square preprint supplement (doi:10.21203/rs.3.rs-8755490/v1)
Supplement: Supplementary file 1 [file 833dfe3c783776740640e145.docx]

**Supplementary Material:**

**Evolution of oral microbiota during adolescence – a longitudinal study from Finland**

Nitin Agrawal1,2, Rebecka Ventin-Holmberg1,3, Binu Mathew 4, Heli Viljakainen*1,2

*1Folkhälsan Research Center, Helsinki, Finland;2 Human Microbiome Research Program, Faculty of Medicine, University of Helsinki, Finland;3* *School of Pharmacy, Faculty of Health Sciences, University of Eastern Finland, Kuopio, Finland; 4*

*Corresponding author

Contact information for corresponding author: Heli Viljakainen, Folkhälsan Research Center, Topeliuksekautu 20, 00250 Helsinki, Finland, [heli.viljakainen@helsinki.fi.fi](mailto:heli.viljakainen@helsinki.fi.fi), +358504485660

We examined how differences in microbiota composition at baseline are related to the weight changes over a two-year period.

Among participants with underweight, we observed no differences in microbiota composition between those who remained stable at UW (UWtoUW) and those who increased to normal-weight category (UWtoNW) (*pcorr* > 0.2) (**Figure 1a)**. In the NW category, we tested differences between stable (NWtoNW), increased (NWtoOW), and decreased (NWtoUW) groups (**Figure 1b**), but marked no differences between these groups either (*pcorr* > 0.1). The OW category showed no compositional differences either between the stable (OWtoOW) and decreased group (OWtoNW) (*pcorr* > 0.2).

In the without central obesity category (nonCO), the composition did not differ between stable (nonCOtononCO) and increased (nonCOtoCO) groups (*pcorr* >0.3). Likewise, in the with central obesity category, the decreased (COtononCO) and stable (COtoCO) groups showed no differences in microbiota composition (*pcorr* > 0.3).
